# Supplementary material
Source: PubMed Central journal article supplement (PMC2556285)
Supplement: NIHMS60335-supplement-SI1.pdf [file NIHMS60335-supplement-SI1.pdf]

Supporting Material:

# Spectroscopic and Kinetic Studies of Perturbed Trinuclear Copper Clusters: The Role of Protons in Reductive Cleavage of the O-O Bond in the Multicopper Oxidase Fet3p.

*Anthony J. Augustine<sup>†</sup>, Liliana Quintanar<sup>†</sup>, Christopher S. Stoj<sup>§</sup>, Daniel J. Kosman<sup>§\*</sup>,  
Edward I. Solomon<sup>†\*</sup>*

<sup>†</sup>Department of Chemistry, Stanford University, Stanford, California 94305  
<sup>§</sup>Department of Biochemistry, School of Medicine and Biomedical Sciences,  
State University of New York, Buffalo, New York 14214

Figure S1. Room temperature absorption spectra (A) and X-band EPR spectra at 77 (B) of holo WT Fet3p and E487D, E487A, and D94E mutants

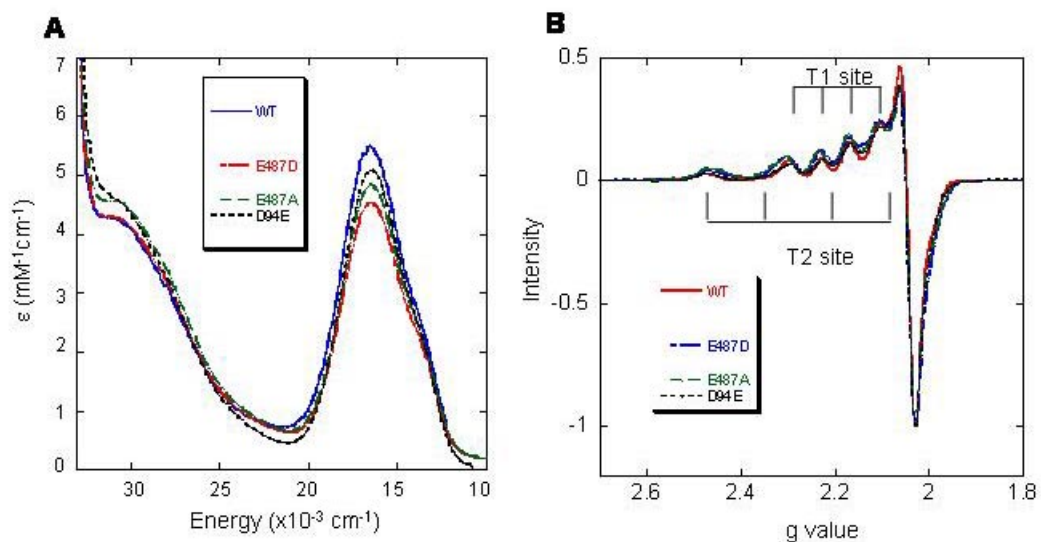

Figure S2. Gaussian Fits of absorption and CD spectra

| Band no.    | T1D                 |                             | T1DE487D            |                             | T1DE487A            |                             | T1DD94E             |                             |
|-------------|---------------------|-----------------------------|---------------------|-----------------------------|---------------------|-----------------------------|---------------------|-----------------------------|
|             | energy <sup>a</sup> | $\Delta\epsilon/\epsilon^b$ |
| 1 d-d       | 10200               | N/D                         | 10200               | N/D                         | 10200               | N/D                         | 10200               | N/D                         |
| 2 d-d       | 12500               | -8.41                       | 12500               | -6.3                        | 12500               | -4.61                       | 12430               | -18.4                       |
| 3 d-d       | 14080               | 1.39                        | 14080               | 4.19                        | 14080               | 1.56                        | 15490               | 3.46                        |
| 4 d-d       | 15120               | -9.47                       | 15120               | -5.95                       | 15120               | -2.18                       | 13190               | -0.99                       |
| 5 d-d       | 17300               | 18.9                        | 17300               | 18.5                        | 17300               | 19.0                        | 17200               | 23.1                        |
| 6 d-d       | 19630               | 31.2                        | 19630               | 13.1                        | 19630               | 12.0                        | 19100               | 29.7                        |
| 7 His $\pi$ | 24770               | -0.68                       | 24770               | -0.68                       | 24750               | -0.19                       | 23900               | -1.11                       |
| 8 $\mu$ -OH | 28000               | 0.38                        | 28000               | 0.33                        | 28000               | 0.48                        | 28250               | 0.22                        |
| 9 $\mu$ -OH | 30400               | -0.18                       | 30650               | -0.2                        | 30800               | -0.10                       | 30800               | -0.17                       |

<sup>a</sup> Energies are in cm<sup>-1</sup> and obtained through a simultaneous fit of the CD and absorption

spectra. <sup>b</sup> The Khun anisotropy factors are a ratio of the CD intensity ( $\Delta\epsilon$  M<sup>-1</sup>cm<sup>-1</sup>) to the absorption intensity ( $\epsilon$  mM<sup>-1</sup>cm<sup>-1</sup>).

Figure S3. EPR Spin Hamiltonian Parameters

|        | T1D   | T1DE487D | T1DE487A | T1DD94E |
|--------|-------|----------|----------|---------|
| $g_x$  | 2.041 | 2.041    | 2.041    | 2.038   |
| $g_y$  | 2.055 | 2.055    | 2.055    | 2.055   |
| $g_z$  | 2.243 | 2.243    | 2.243    | 2.243   |
| $Ax^a$ | 17    | 17       | 17       | 17      |
| $Ay^a$ | 15    | 15       | 15       | 15      |
| $Az^a$ | 190   | 190      | 190      | 188     |

<sup>a</sup> All hyperfine coupling constants, A values, are shown in  $X \times 10^{-4} \text{ cm}^{-1}$

Figure S4. Gaussian fit of MCD spectra

| Band no.    | T1D<br>energy/cm <sup>-1</sup> | T1DE487D<br>energy/cm <sup>-1</sup> | T1DE487A<br>energy/cm <sup>-1</sup> | T1DD94E<br>energy/cm <sup>-1</sup> |
|-------------|--------------------------------|-------------------------------------|-------------------------------------|------------------------------------|
| 1 $xy$      | (+) 9800                       | (+) 9800                            | (+) 9800                            | (+) 10000                          |
| 2 $z^2$     | (-) 10540                      | (-) 10540                           | (-) 10540                           | (-) 11080                          |
| 3 $xz$      | (+) 11700                      | (+) 11700                           | (+) 11700                           | (+) 11540                          |
| 4 $yz$      | (-) 13940                      | (-) 13940                           | (-) 13940                           | (-) 14380                          |
| 5 His $\pi$ | (-) 16700                      | (+) 18930                           | (+) 18720                           | (-) 16800                          |
| 6 OH $\pi$  | (-) 20140                      | (+) 21980                           | (+) 22330                           | (-) 20400                          |
| 7 His $\pi$ | (-) 24800                      | (+) 26590                           | (+) 25510                           | (-) 25280                          |
| 8 His $\pi$ | (+) 28270                      | (+) 27930                           | (+) 27500                           | (+) 28300                          |
| 9 His $\pi$ | (+) 30800                      | (+) 30940                           | (+) 30960                           | (+) 30900                          |

Figure S5. Room temperature CD spectrum of T1D PI from 5000 – 33,000 cm<sup>-1</sup>

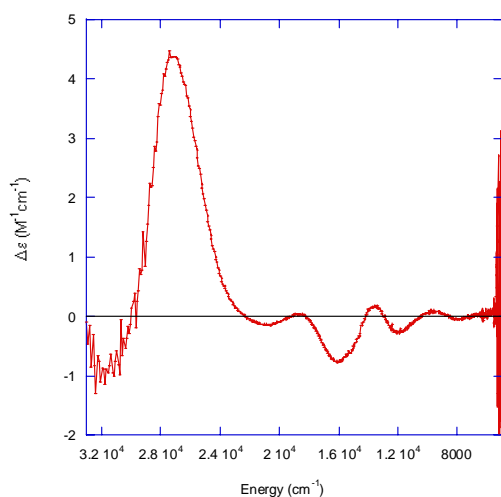

Figure S6. Gaussian Fits of absorption and CD spectra

| Band no. | T1D PI              |                             | T1DE487D PI         |                             | T1DE487A PI         |                             | T1DD94E PI          |                             |
|----------|---------------------|-----------------------------|---------------------|-----------------------------|---------------------|-----------------------------|---------------------|-----------------------------|
|          | energy <sup>a</sup> | $\Delta\epsilon/\epsilon^b$ |
| 2        | 11690               | -0.72                       | 11600               | -0.63                       | 12000               | -0.78                       | 12430               | -0.62                       |
| 3        | 14230               | 0.54                        | 14270               | 13.4                        | 14310               | 0.74                        | 13920               | 1.44                        |
| 4        | 15280               | -1.61                       | 15100               | -5.95                       | 15150               | -1.76                       | 14680               | -4.39                       |
| 5        | 16540               | -0.98                       | 16510               | -0.64                       | 16470               | -0.58                       | 16060               | -0.83                       |
| 6        | 20850               | -0.15                       | 20650               | -0.10                       | 21130               | -0.02                       | 20920               | -0.06                       |
| 7        | 24800               | 0.26                        | 25020               | 0.77                        | 25040               | 0.21                        | 24550               | 0.30                        |
| 8        | 27580               | 0.94                        | 27730               | 1.12                        | 27580               | 1.20                        | 27210               | 0.76                        |
| 9        | 30625               | -0.21                       | 31340               | -0.40                       | 30820               | -0.15                       | 30660               | -0.19                       |

<sup>a</sup> Energies are in cm<sup>-1</sup> and obtained through a simultaneous fit of the CD and absorption spectra. <sup>b</sup> The Khun anisotropy factors are a ratio of the CD intensity ( $\Delta\epsilon \text{ M}^{-1}\text{cm}^{-1}$ ) to the absorption intensity ( $\epsilon \text{ mM}^{-1}\text{cm}^{-1}$ ).

S7. For analysis of kinetic isotope effects using the Westheimer model, a linear transition state is assumed of type A-----B-----C where in this case A is the starting point, a carboxylate and C is the ending point, the  $\mu$ 2-OH in the native intermediate, and B is the proton of interest.

The kinetic isotope effect (KIE) is given by the following formula:

$$\text{KIE} = (\text{zero-point energy}) \times (\text{mass and moments of inertia}) \times (\text{excited vibrational states})$$

In the Westheimer model the KIE is only dependent upon the zero-point energy (ZPE) as the other components are approximated to be 1, which is a fair approximation under the conditions of the experiments performed herein.

The KIE was then calculated for 3 possible transition states (TS): a product-like TS, a reactant-like TS, and a symmetric TS where the proton (B) is located near the midpoint between A and C. The results are summarized in the following table:

| Position of TS | KIE  |
|----------------|------|
| Reactant       | 1.00 |
| Symmetric      | 6.90 |
| Product        | 0.70 |

In all cases, the initial A-B bond frequency (that for a carboxylate O-H stretch) was taken as  $3000\text{ cm}^{-1}$  and the final product B-C bond frequency (that for the  $\mu$ 2-OH stretch in the native intermediate) was taken as  $3600\text{ cm}^{-1}$ . And the ZPE was calculated as:

$$\text{ZPE} = \exp[1/2(U_{\text{Hreactant}} - U_{\text{Dreactant}}) - (U_{\text{HTS}} - U_{\text{HTS}})] \text{ and } U_i = hv_i/k_B T$$

Where  $h$  is Planck's constant ( $6.626 \times 10^{-34}\text{ J s}$ ),  $k_B$  is Boltzmann's constant ( $1.38066 \times 10^{-23}\text{ J K}^{-1}$ ), and  $T$  the absolute temperature ( $T = 293\text{ K}$  for the calculations in this paper).
